# Supplementary material
Source: Research Square preprint supplement (doi:10.21203/rs.3.rs-10083654/v1)
Supplement: Supplementary file 2 [file 995e3140a174949730022610.docx]

Supporting Information for

Vapor-Liquid-Liquid-Solid Synthesis of Single-Crystalline Weyl Semimetal NbP Nanowires with Reduced Resistivity

Qinyuan Jiang1,2, Shisong Luo1, Hongjing Xu3, Ang Tao4, Xinyan Li2,4, R. Colby Evans5, Shun-Li Shang6, Shengjie Yu1,7, Arka Chatterjee1, Wenjing Wu1,7, Ching-Tzu Chen8, Zhi-Xun Shen9,10,11,12, Zi-Kui Liu6, Pavel Kabos13, Yimo Han2,4,14, Yuji Zhao1, Pavan Hosur15,16, Ramamoorthy Ramesh2,3,4*, Junichiro Kono1,2,3,4,14*, Shengxi Huang1,2*

1Department of Electrical and Computer Engineering, Rice University, Houston, TX 77005, USA.

2Rice Advanced Materials Institute, Rice University, Houston, TX 77005, USA

3Department of Physics and Astronomy, Rice University, Houston, TX 77005, USA

4Department of Materials Science and NanoEngineering, Rice University, Houston, TX 77005, USA

5National Institute of Standards and Technology, Applied Chemicals and Materials Division, Boulder, CO 80305, USA

6Department of Materials Science and Engineering, The Pennsylvania State University, University Park, PA 16802, USA

7Applied Physics Graduate Program, Smalley–Curl Institute, Rice University, Houston, TX 77005, USA

8IBM Thomas J. Watson Research Center, Yorktown Heights, NY 10598, USA

9Stanford Institute for Materials and Energy Sciences, SLAC National Accelerator Laboratory, Menlo Park, CA 94025, USA

10Department of Physics, Stanford University, Stanford, CA 94305, USA

11Department of Applied Physics, Stanford University, Stanford, CA 94305, USA

12Geballe Laboratory for Advanced Materials, Stanford University, Stanford CA 94305, USA

13National Institute of Standards and Technology, Applied Physics Division, Boulder, CO 80305, USA

14Smalley–Curl Institute, Rice University, Houston, TX 77005, USA

15Department of Physics, University of Houston, Houston, TX 77204, USA

16Texas Center for Superconductivity at the University of Houston, Houston, TX 77204, USA

*E-mail: ramamoorthy.ramesh@rice.edu; kono@rice.edu; shengxi.huang@rice.edu

**Text S1.** Polarization-dependent Raman intensity of NbP nanowires.

The polarization-dependent Raman intensity of NbP nanowires can be explained by the Raman tensor theory. For the case of *A*1 mode of *C*4*v* point group which NbP belongs to, the corresponding Raman tensor is in the form of . For a NbP nanowire growing along its *c* axis and lying on the substrate, its Raman tensor should be transformed from sample coordinates to experimental coordinates by applying a rotation matrix

, where is a random rotation angle along *c* axis. Therefore, the transformed Raman tensor for *A*1 mode is

The polarization-dependent Raman intensity is defined by

, where and are the polarization vectors for incident and scattered beams, respectively. By defining as the polarization angle with respect to the *X* axis in the experimental coordinates, and aligning both incident and scattered beams (*i.e.*, ), the -dependence of Raman intensity can thus be calculated

Similarly, for a NbP nanowire growing along its *a* axis and lying on the substrate, its rotation matrix is , where is a random rotation angle along *a* axis. The transformed Raman tensor for *A*1 mode is , which is dependent on . The Raman intensity is proportional to , which also indicates a dependence on , as long as .

**Text S2.** Bulk and slab structures and more first-principle results.

NbP crystallizes in a body-centered tetragonal structure with space group *I*41md (No. 109), containing 8 atoms per unit cell. The experimental lattice parameters, determined by single-crystal X-ray diffraction, are a = 3.3324 Å and c = 11.3705 Å.1 These values are in good agreement with the present first-principles calculations, as summarized in Table S1.

Slab models of NbP with various surface terminations were constructed by cleaving the bulk structure along the (001), (100), and (110) crystallographic planes. To suppress artificial interactions between periodically repeated slabs, a vacuum layer exceeding 15 Å was introduced normal to the surface. Additional details regarding slab thickness, termination, and k-point sampling are provided in Table S2.

First-principles density functional theory (DFT) calculations indicate that the (110) surface termination is energetically the most favorable among those considered (Table S3). Using the PBEsol exchange-correlation (X-C) functional, the calculated surface energies are 2.50, 2.97, and 2.53 J/m² for the (001), (100), and (110) surfaces, respectively. Complementary calculations performed with the PBE generalized gradient approximation (GGA) reveal systematically lower surface energies, yielding values of 2.22, 2.65, and 2.19 J/m² for the (001), (100), and (110) surfaces, respectively. Overall, the PBEsol functional predicts surface energies approximately 0.3 J/m² higher than those obtained with PBE, consistent with its improved treatment of densely packed solids and surfaces.

**Table S1.** Predicted and experimentally measured lattice parameters of bulk NbP.

| Source | a (Å) | c (Å) |
| --- | --- | --- |
| X-C of PBEsol | 3.316 | 11.260 |
| X-C of GGA-PBE | 3.342 | 11.400 |
| Experiment1 | 3.3324 | 11.3705 |

**Table S2.** Built supercells of NbP used to calculate surface energies together with the employed *k*-point (kp) meshes for the bulk and slab supercells.

| (001) surface | | | (100) surface | | | (110) surface | | |
| --- | --- | --- | --- | --- | --- | --- | --- | --- |
| Supercell | kp_bulk | kp_slab | Supercell | kp_bulk | kp_slab | Supercell | kp_bulk | kp_slab |
| 24-atom  1×1×3a | 12×12×1 | 12×12×1 | 36-atom  6×1×1a | 2×12×4 | 1×12×4 | 64-atom  4×1×1b | 2×8×4 | 1×8×4 |

a Built supercell is with respect to the original 8-atom 1×1×1 tetragonal cell.

b Built supercell is with respect to the 16-atom  supercell.

**Table S3.** Predicted surface energies (J/m2) of NbP by DFT-based calculations using the X-C functionals of GGA-PBE and PBEsol.2, 3

| X-C functional | (001) | (100) | (110) |
| --- | --- | --- | --- |
| PBEsol | 2.500 | 2.971 | 2.530 |
| GGA-PBE | 2.222 | 2.650 | 2.194 |


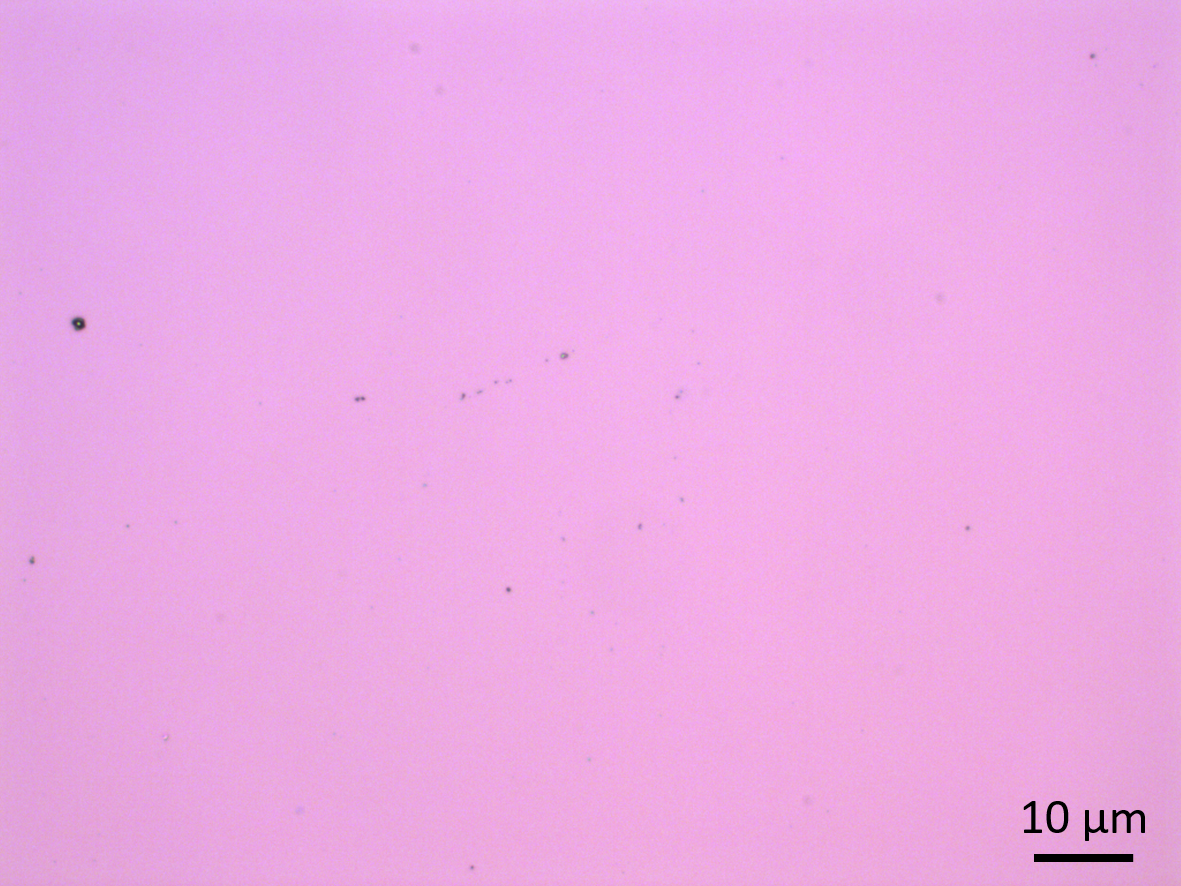


**Figure S1.** Growth result when NaCl was not added. The nearly bare SiO2/Si substrate indicates the critical role of NaCl in forming volatile Nb species.


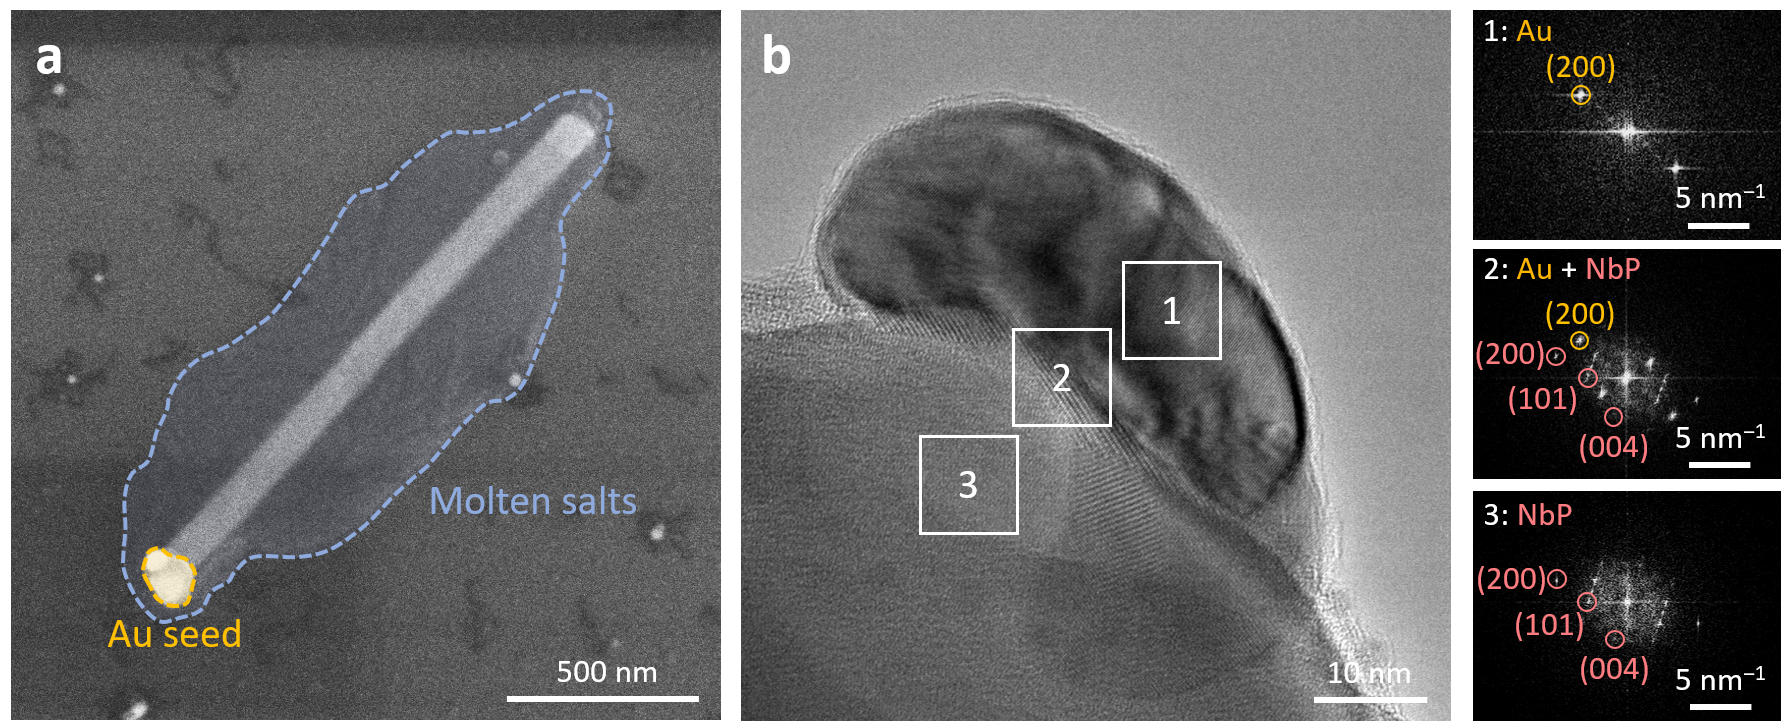


**Figure S2.** Morphology of NbP nanowires grown from Au seeds. (a) SEM image of a NbP nanowire with a Au seed at one end and the trace of molten salts. (b) TEM image of the interfacial structure between Au and NbP and the corresponding FFT patterns of three regions. Region 1: only Au lattice. Region 2: both Au and NbP lattices. Region 3: only NbP lattice.


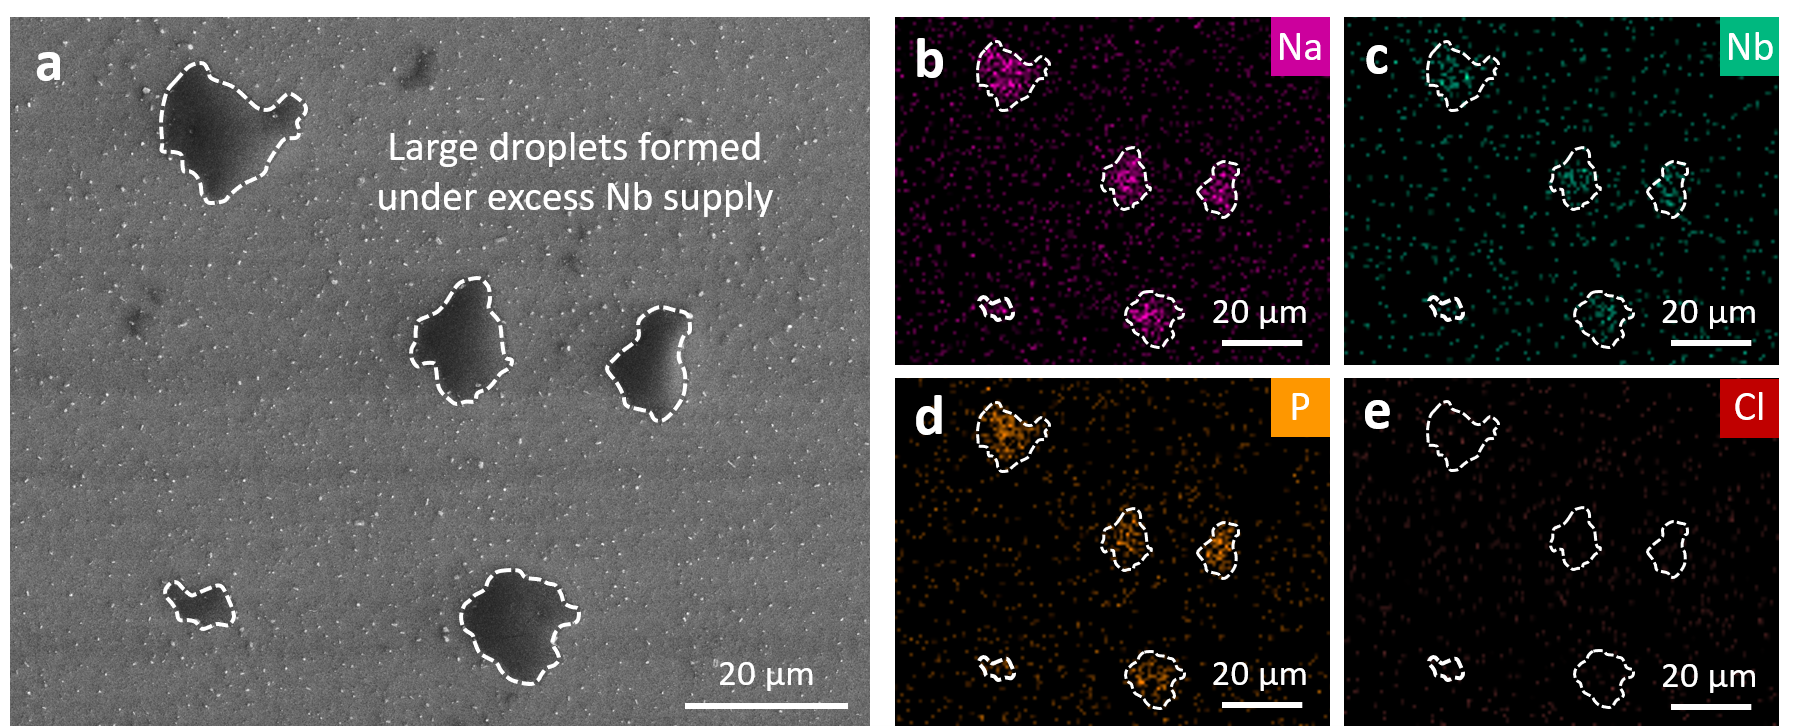


**Figure S3.** Composition analysis of molten salts formed on growth substrates. (a) SEM image of the large droplets (marked with dashed lines) formed during growth when introducing excess Nb supply. (b–e) EDS mapping images of (a), showing the elemental distributions of (b) Na, (c) Nb, (d) P, and (e) Cl, respectively. The strong and concentrated EDS signals from Na, Nb and P indicate that molten salts have a complicated composition of Na*x*Nb*y*P*z*O*w* (O element mapping is not shown here due to the overwhelming background signal from the SiO2/Si substrate). The absence of Cl in droplets could be attributed to the formation of volatile intermediates such as NbOCl3.


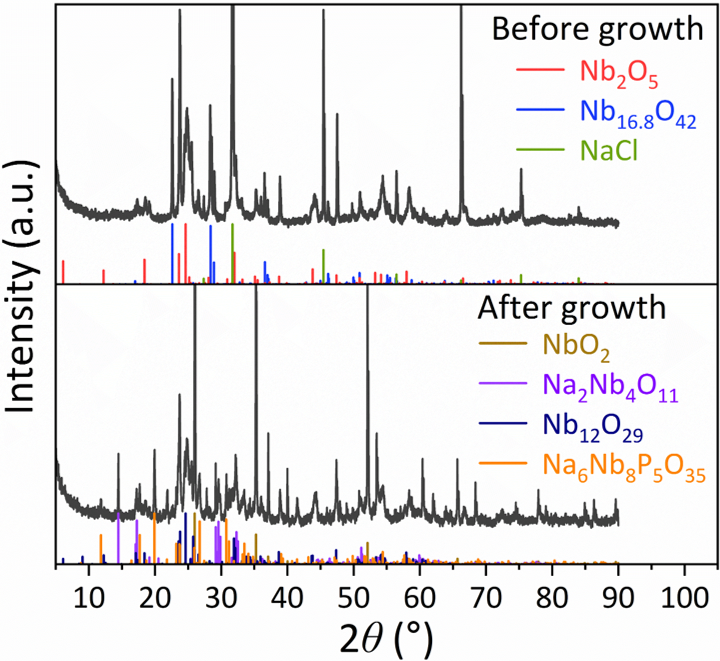


**Figure S4.** XRD patterns of the Nb source placed in a quartz boat before and after CVD growth. Nb2O5 (JCPDS# 72-1484), together with another phase denoted as Nb16.8O42 (JCPDS# 71-0336) and NaCl (JCPDS# 75-0306), served as a mixed precursor for supplying Nb. After growth, reduced Nb oxides, such as Nb12O29 (JCPDS# 73-1589) and NbO2 (JCPDS# 89-8555) were identified. The presence of Na2Nb4O11 (JCPDS# 72-1694) indicates the direct reaction between Nb2O5 and NaCl at elevated temperatures, which simultaneously releases the volatile NbOCl3. Na6Nb8P5O35 (JCPDS# 80-1967) formed in the residue implies the phosphorization of the Nb precursor itself when introducing sublimated P.


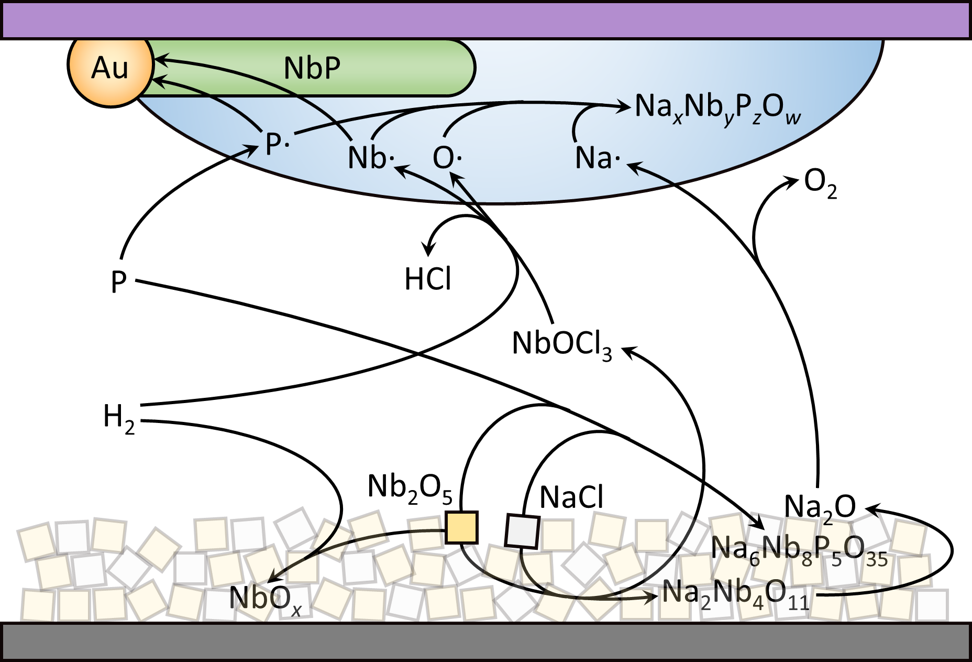


**Figure S5.** Possible reaction network for the VLLS growth of NbP nanowires. The lower and higher parts of this figure illustrate the species in the quartz boat and on the substrate, respectively. As evidenced by the XRD analysis (Figure S4), Nb2O5 and NaCl directly react at elevated temperatures and form Na2Nb4O11 and NbOCl3, which is consistent with the reaction pathways in the CVD growth of NbS2 using similar precursors.4 At the same time, Na2Nb4O11 may reversely decompose into Na2O, niobium oxides and other sodium niobates.5 Na2O further decomposes into Na vapor and O2 at high temperature (> 600 ℃) and low pressure,6 enabling the transfer of Na element from bottom to top, which can be confirmed by the EDS mapping results shown in Figure S3. In addition, the quartz boat, upper substrate and quartz tube were slightly corroded after the growth due to the reaction between Na-containing vapor and SiO2, which could also be seen as a sign of the Na transfer. Moreover, Nb2O5 and Nb16.8O42 with Nb(V) are inevitably reduced by H2 to NbO*x*, *e.g.*, Nb12O29 and NbO2 (Figure S4), with lower valences of Nb. At the presence of sublimated P, Nb2O5 and NaCl are phosphorized and then form Na6Nb8P5O35. As an important volatile Nb intermediate, NbOCl3 decomposes at the substrate surface and releases Nb and O elements to form molten salts, while its Cl atoms combine with H2 and generate HCl. Hence, with the Na, Nb, P, and O elements simultaneously transported from gas phase, droplets of molten salts with a complex composition (Na*x*Nb*y*P*z*O*w*) nucleate on the growth substrate and serve as the reservoir of Nb and P sources. The fluidity of molten salts facilitates the highly efficient migration of Nb and P onto the surface of Au seeds, thus forming NbP nuclei and growing along a specific lattice orientation. Under optimized conditions, the droplets of molten salts are eventually consumed and totally converted into clean NbP nanowires.


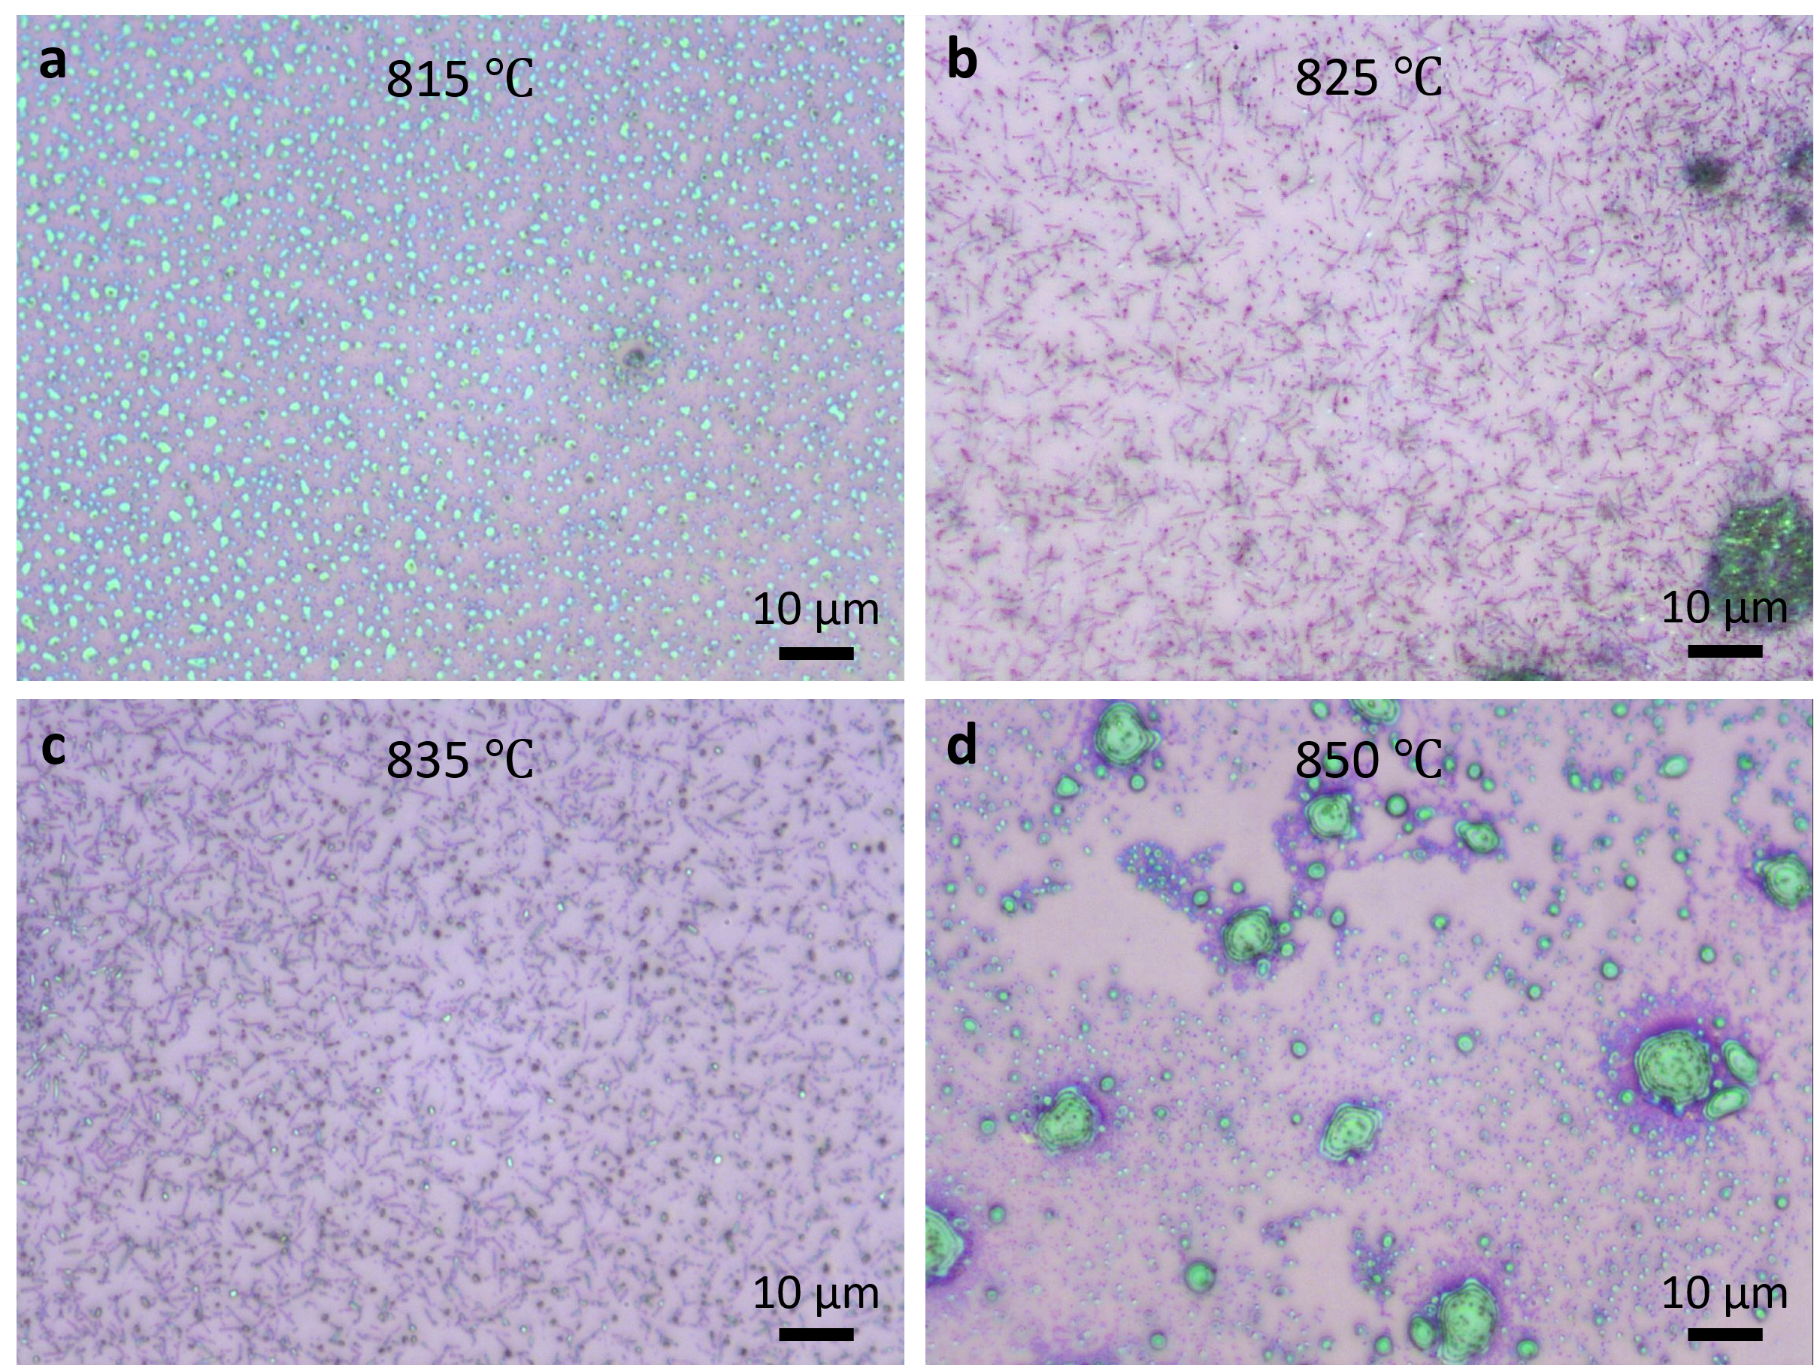


**Figure S6.** Optical microscopy images of the growth results obtained under different temperatures. (a) 815 ℃. (b) 825 ℃. (c) 835 ℃. (d) 850 ℃. A temperature as low as 815 ℃ cannot afford the complete phosphorization of molten salts, leaving tiny droplets and particles after the growth. 825–835 ℃ is a favorable temperature range where the supplies of Nb and P are balanced and the growth kinetics of NbP are fast enough. At 850 ℃, large droplets of molten salts are formed due to the overwhelmingly excess supply of Nb, which breaks the balance between Nb and P supplies and hinders the growth of NbP nanowires.


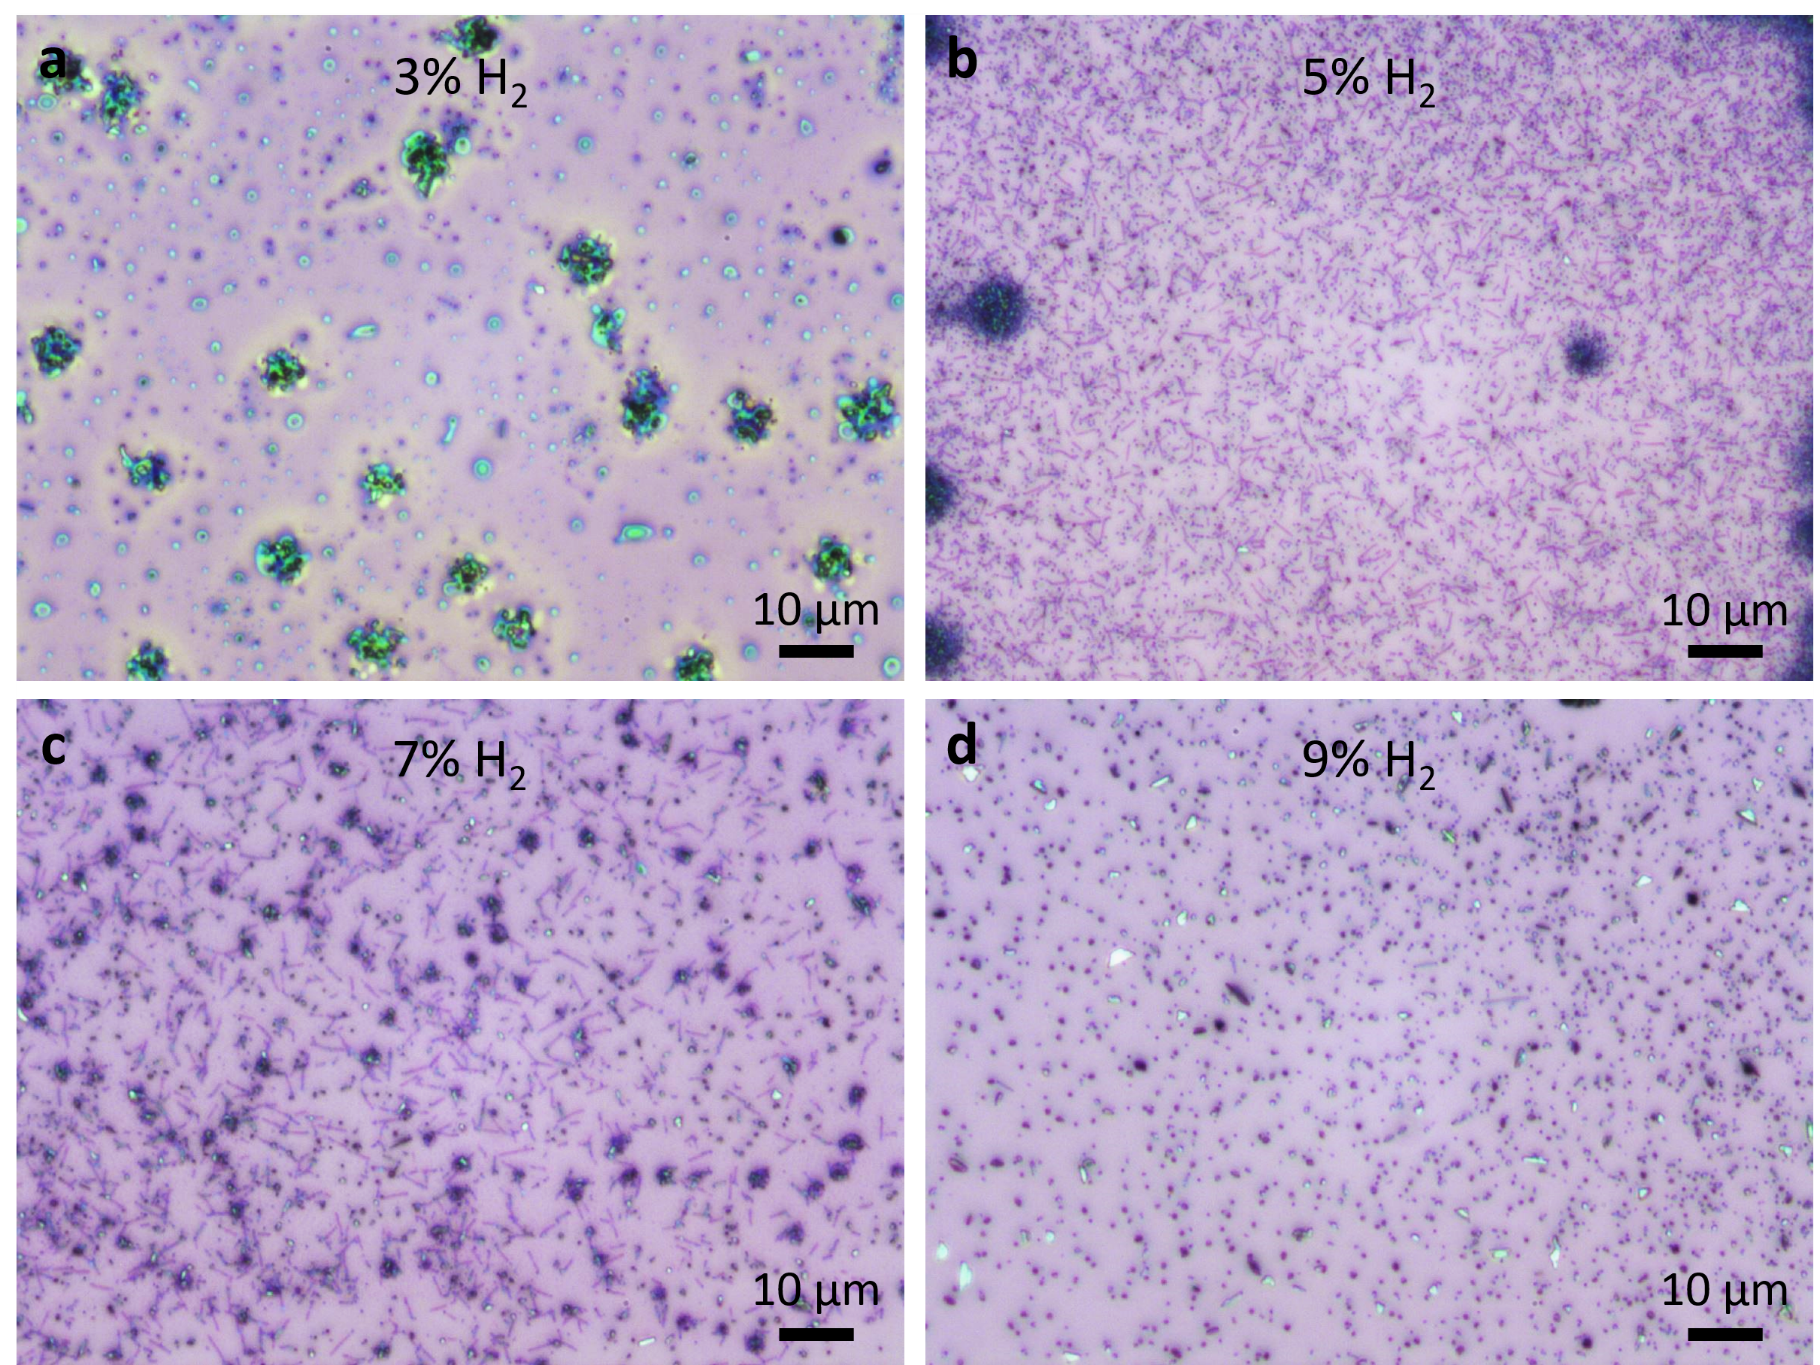


**Figure S7.** Optical microscopy images of the growth results obtained under different H2 concentrations. (a) 3%. (b) 5%. (c) 7%. (d) 9%. H2 has complicated influence on the thermodynamic equilibriums of multiple chemical reactions, such as the formation of PH3 (2P + 3H2 2PH3), the etching of NbP (2NbP + 3H2 2Nb + 2PH3), the reduction of Nb2O5 (Nb2O5 + (5–2*x*)H2 2NbO*x* + (5–2*x*)H2O), *etc*. A H2 concentration of 5–7% is preferable for the growth of NbP nanowires.


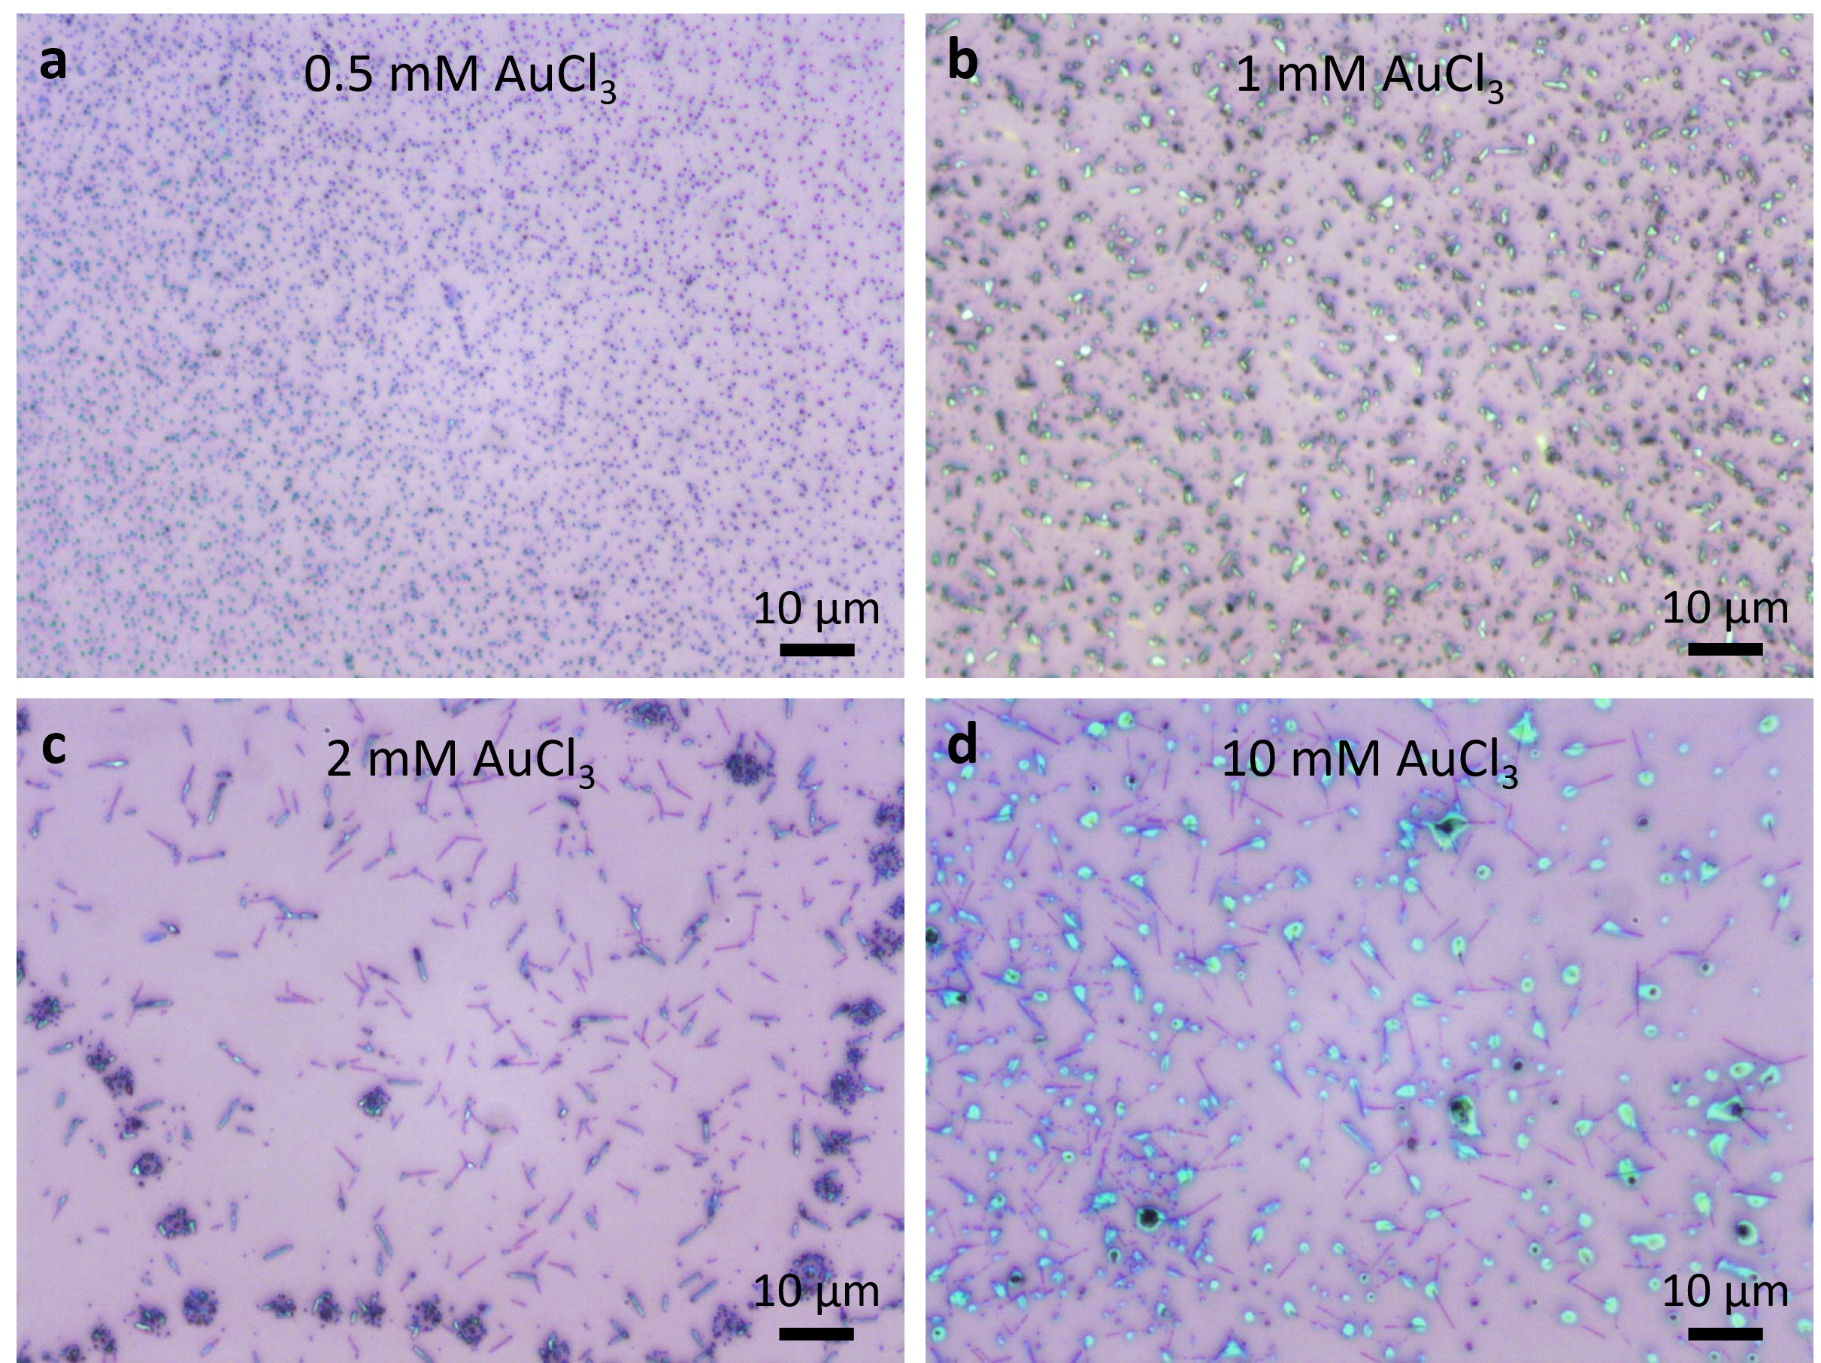


**Figure S8.** Optical microscopy images of the growth results obtained under different AuCl3 concentrations. (a) 0.5 mM. (b) 1 mM. (c) 2 mM. (d) 10 mM. The concentration of Au precursor (AuCl3) mainly affects the size distribution and areal density of Au seeds. Lower concentrations (0.5–1 mM) result in tiny and densely distributed Au nanoparticles, which do not support the growth of NbP nanowires. While at higher AuCl3 concentrations (2–10 mM), the resultant Au nanoparticles are larger and sparsely distributed due to Ostwald ripening, exhibiting a preference for growing NbP nanowires with diameters of 50–100 nm.


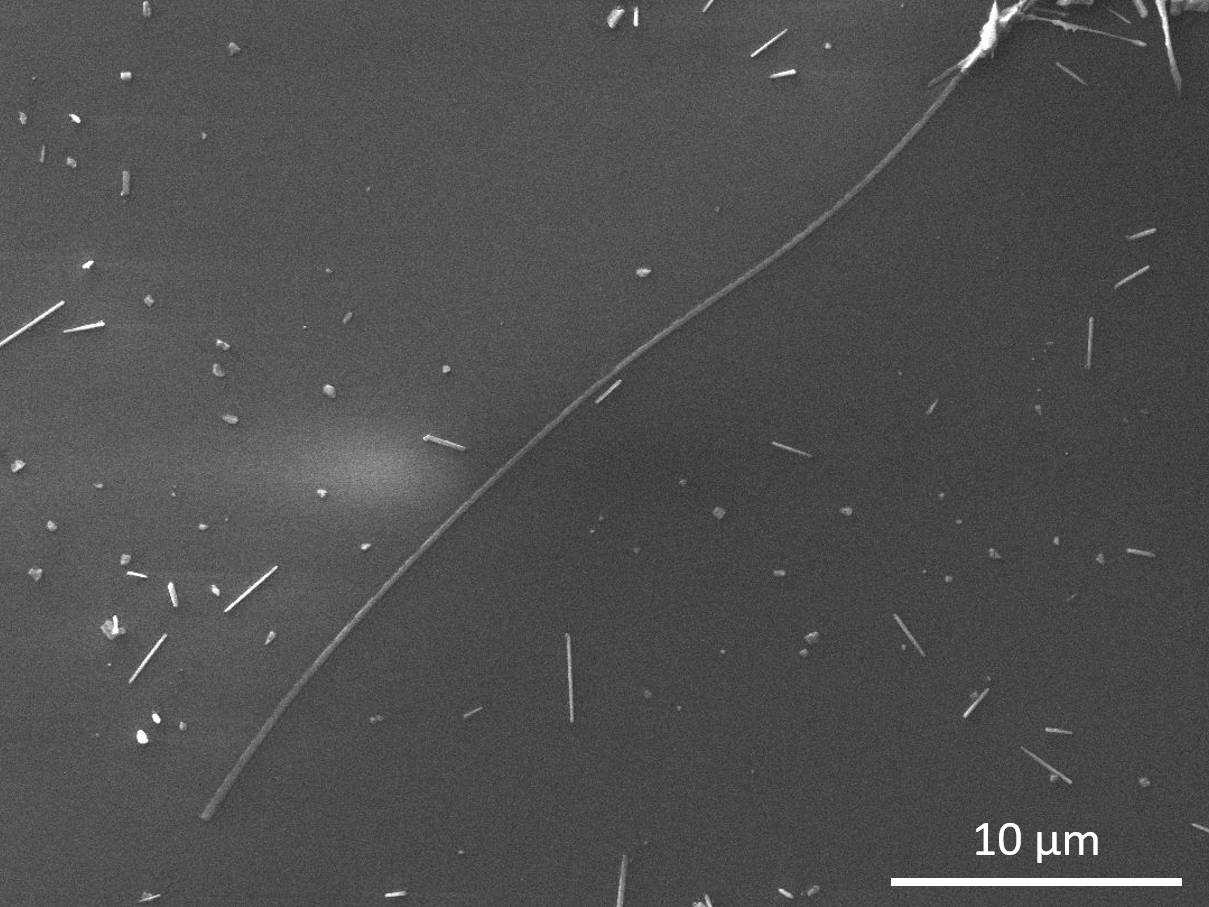


**Figure S9.** SEM image of a NbP nanowire with ~ 40 μm in length.


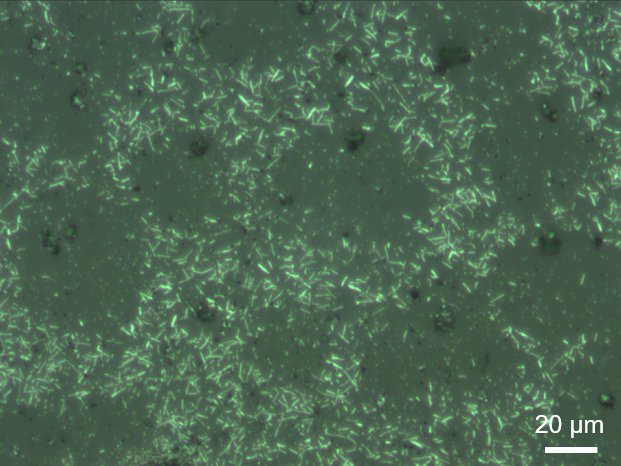


**Figure S10.** Optical microscopy images of the NbP nanowires grown on a single-crystalline quartz substrate.


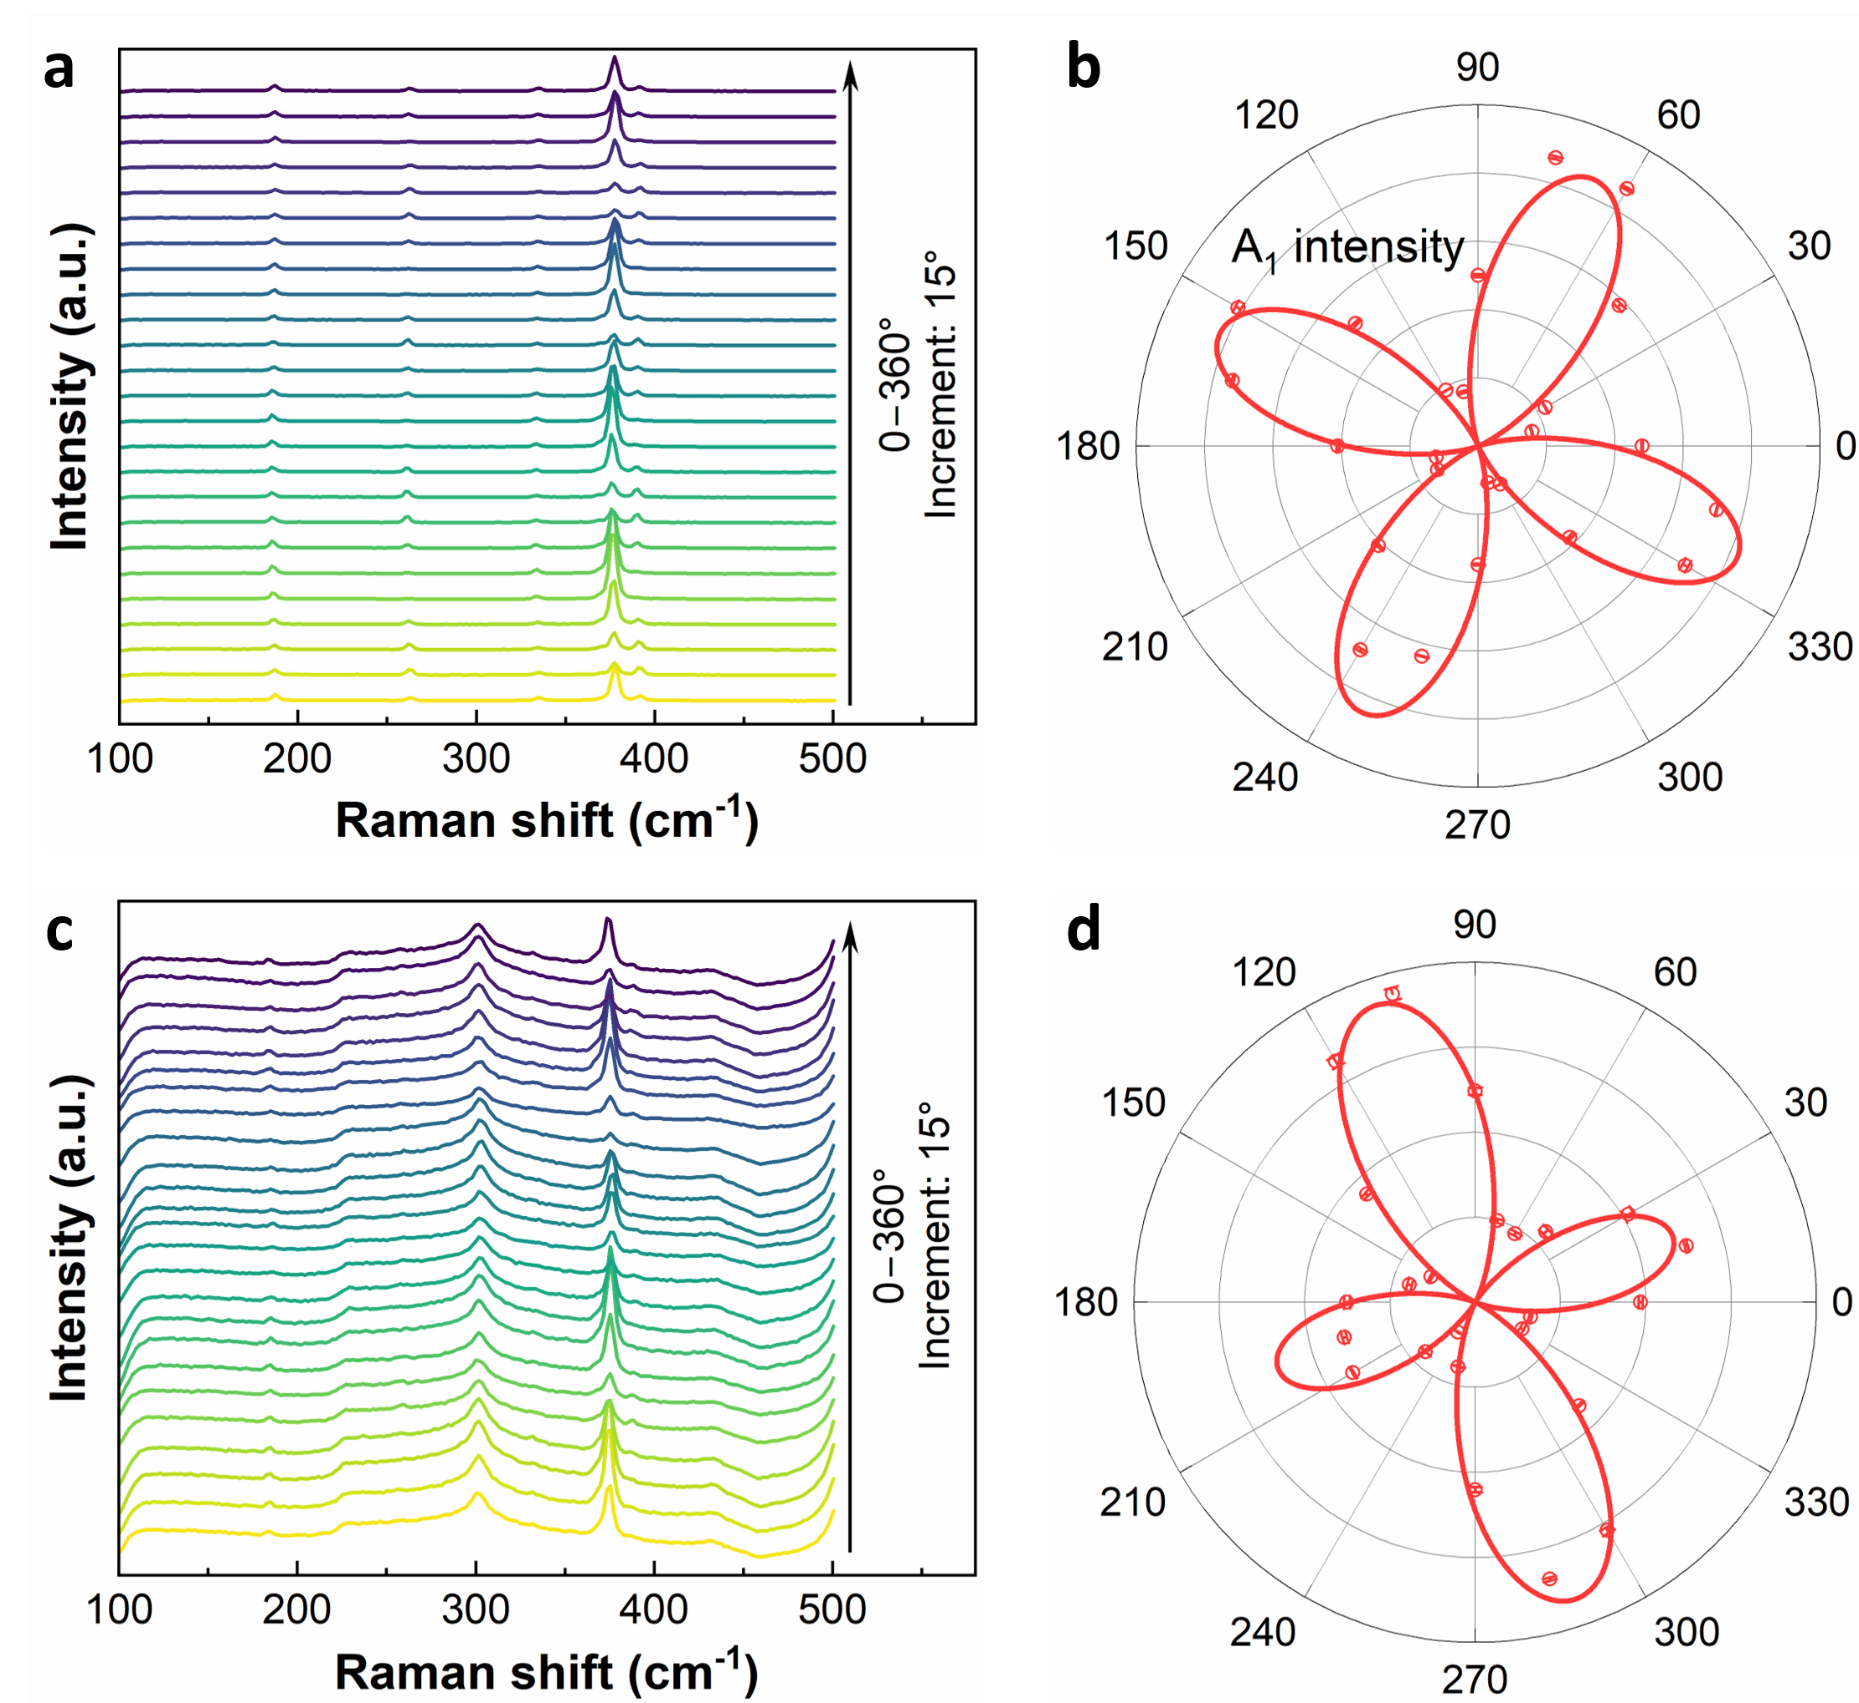


**Figure S11.** Polarized Raman spectra of a NbP bulk crystal and nanowire. (a) Original Raman spectra and (b) extracted *A*1 intensity polar plot of a NbP bulk crystal. (c) Original Raman spectra and (d) extracted *A*1 intensity polar plot of a NbP nanowire.


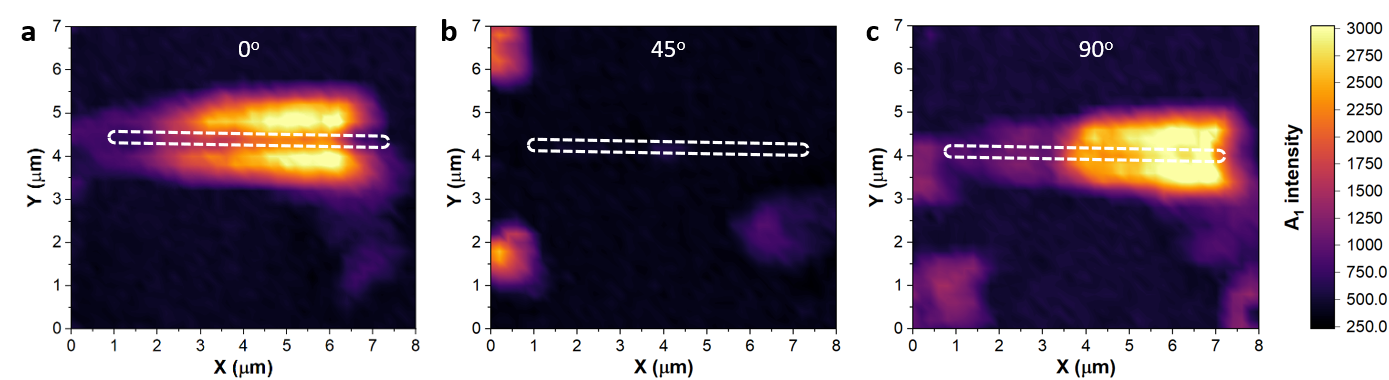


**Figure S12.** Polarized Raman intensity mapping of the *A*1 mode of a NbP nanowire. (a) 0°, (b) 45°, and (c) 90° with respect to the longitudinal direction of the nanowire. The dashed white line indicates the position of this NbP nanowire. Compared with 45°, much higher *A*1 mode intensities were observed over the whole nanowire when the polarization direction was 0° and 90° with respect to the longitudinal direction, verifying the single-crystalline nature. The higher intensity at edges could be attributed to the scattering enhancement at geometric boundaries, as well as a slight defocus change induced by the material’s thickness.


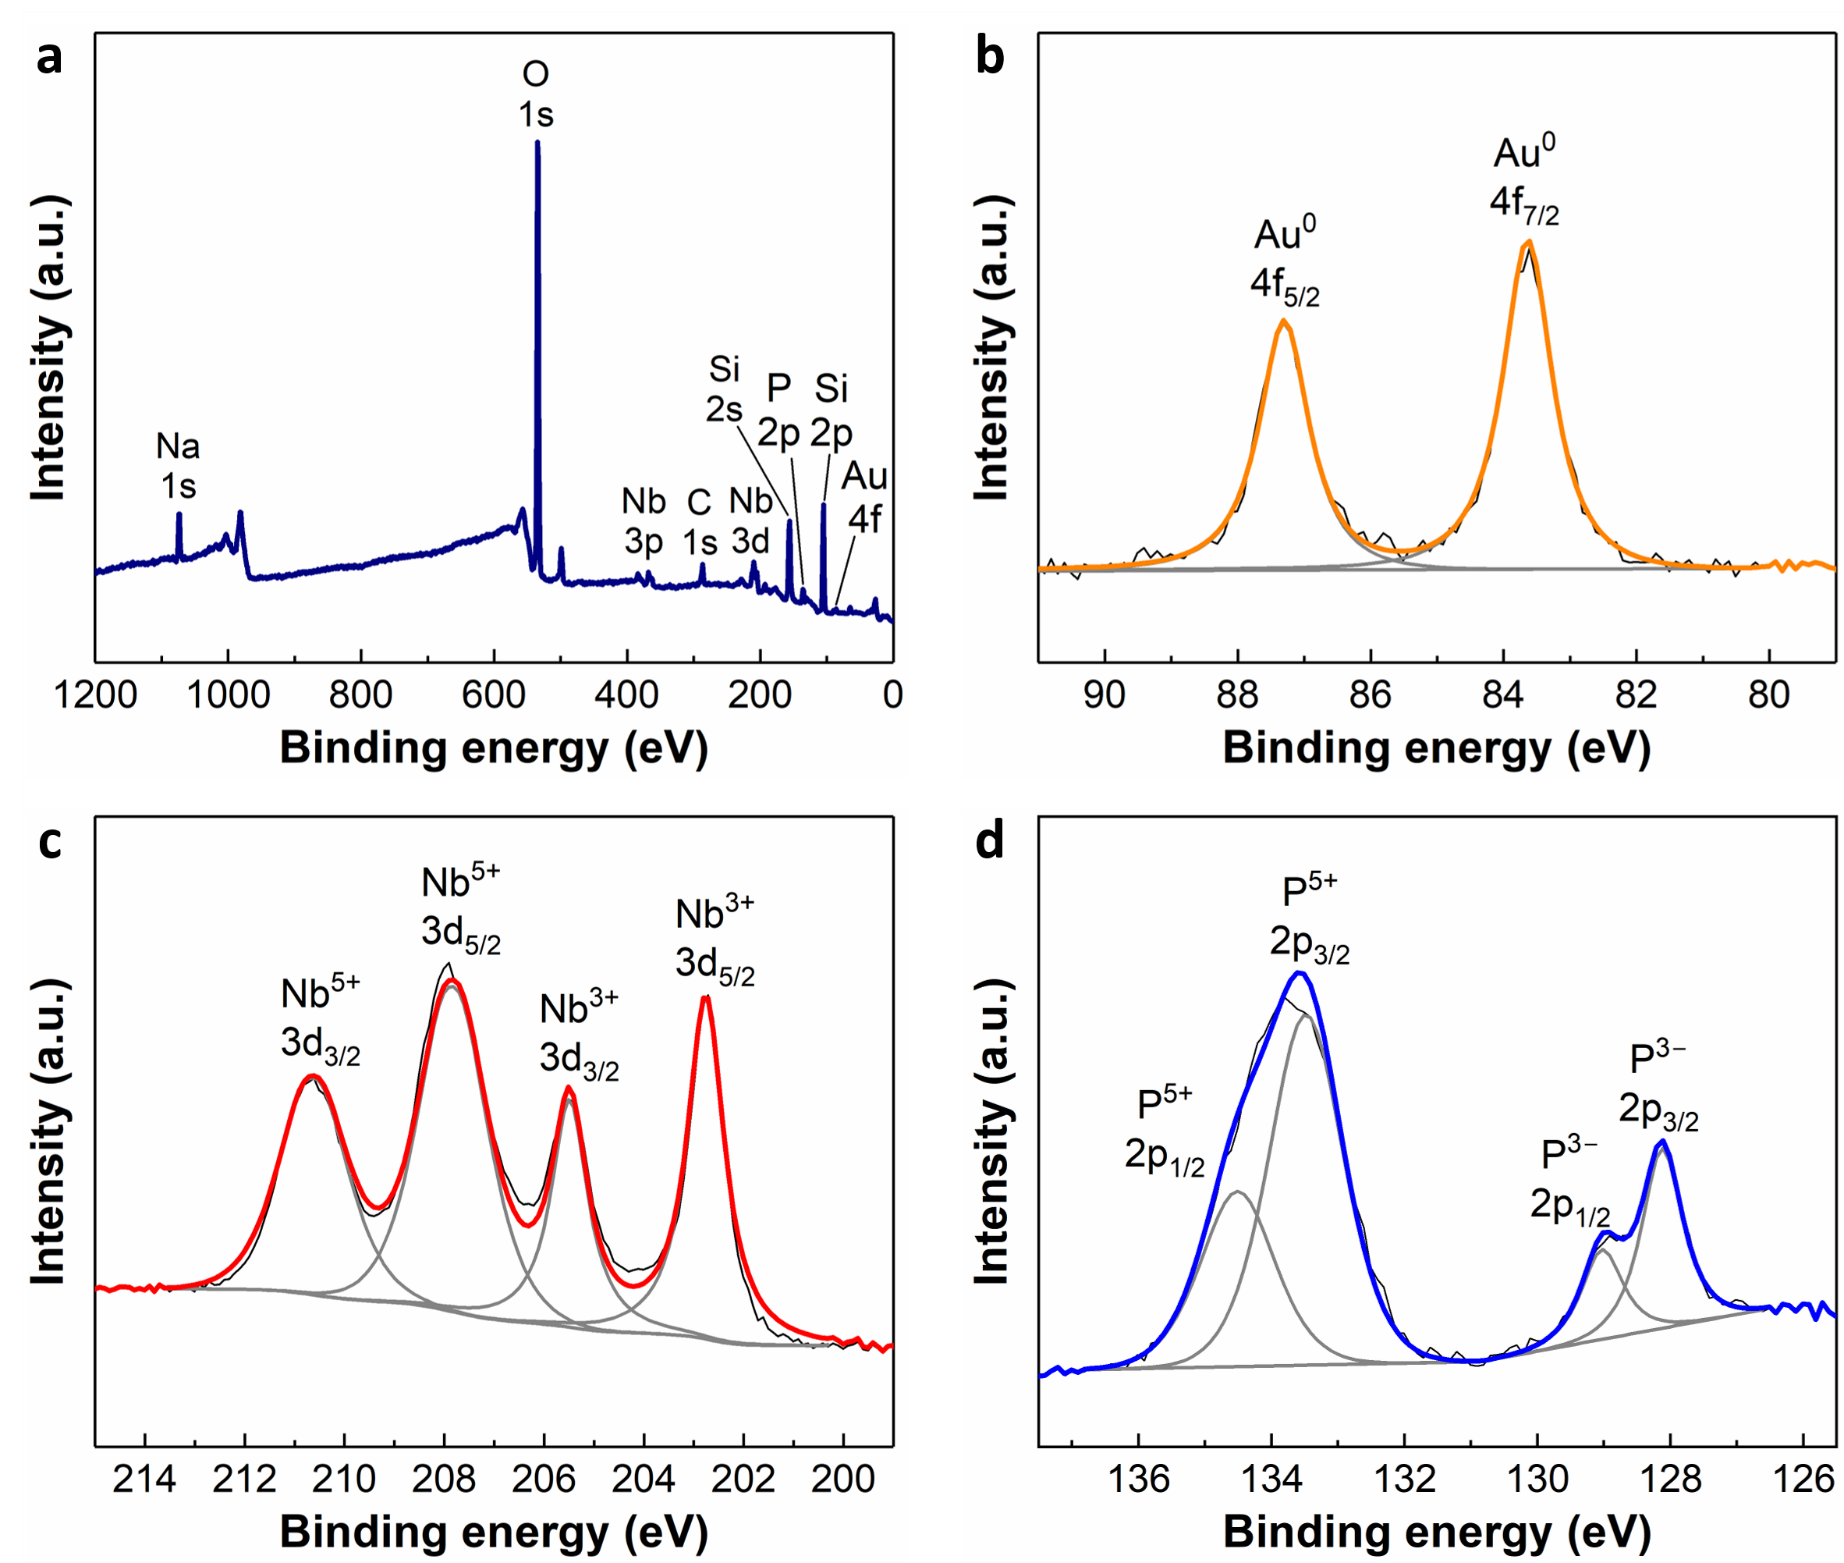


**Figure S13.** XPS spectra of NbP nanowires. (a) XPS survey of all elements. (b) Au 4f spectrum. (c) Nb 3d spectrum. (d) P 2p spectrum.


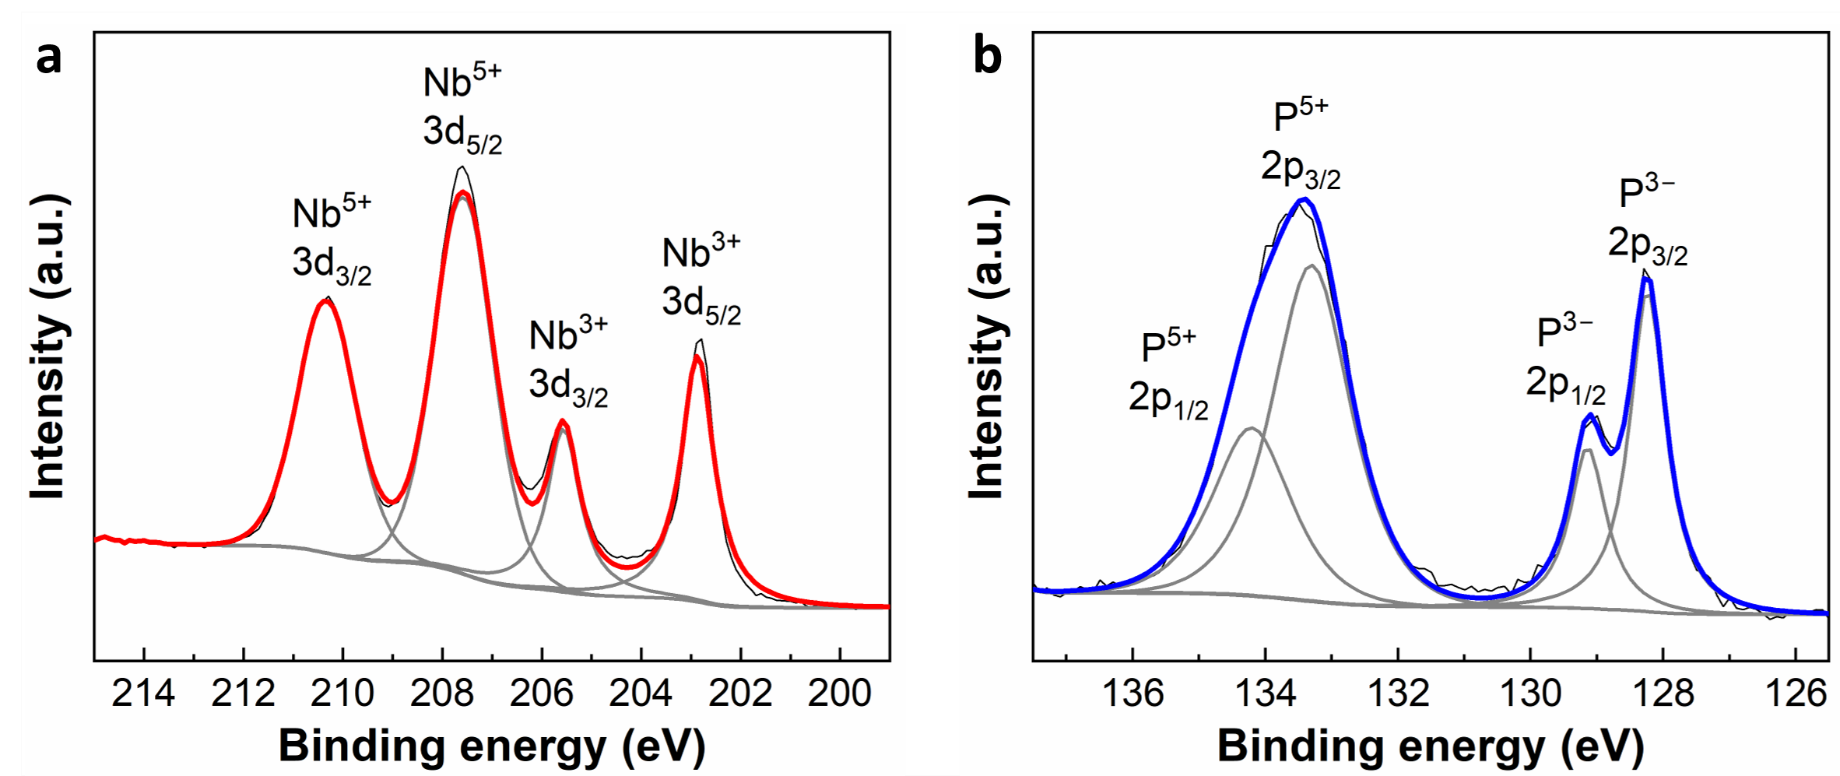


**Figure S14.** XPS spectra of NbP bulk crystals. (a) Nb 3d spectrum. (b) P 2p spectrum.


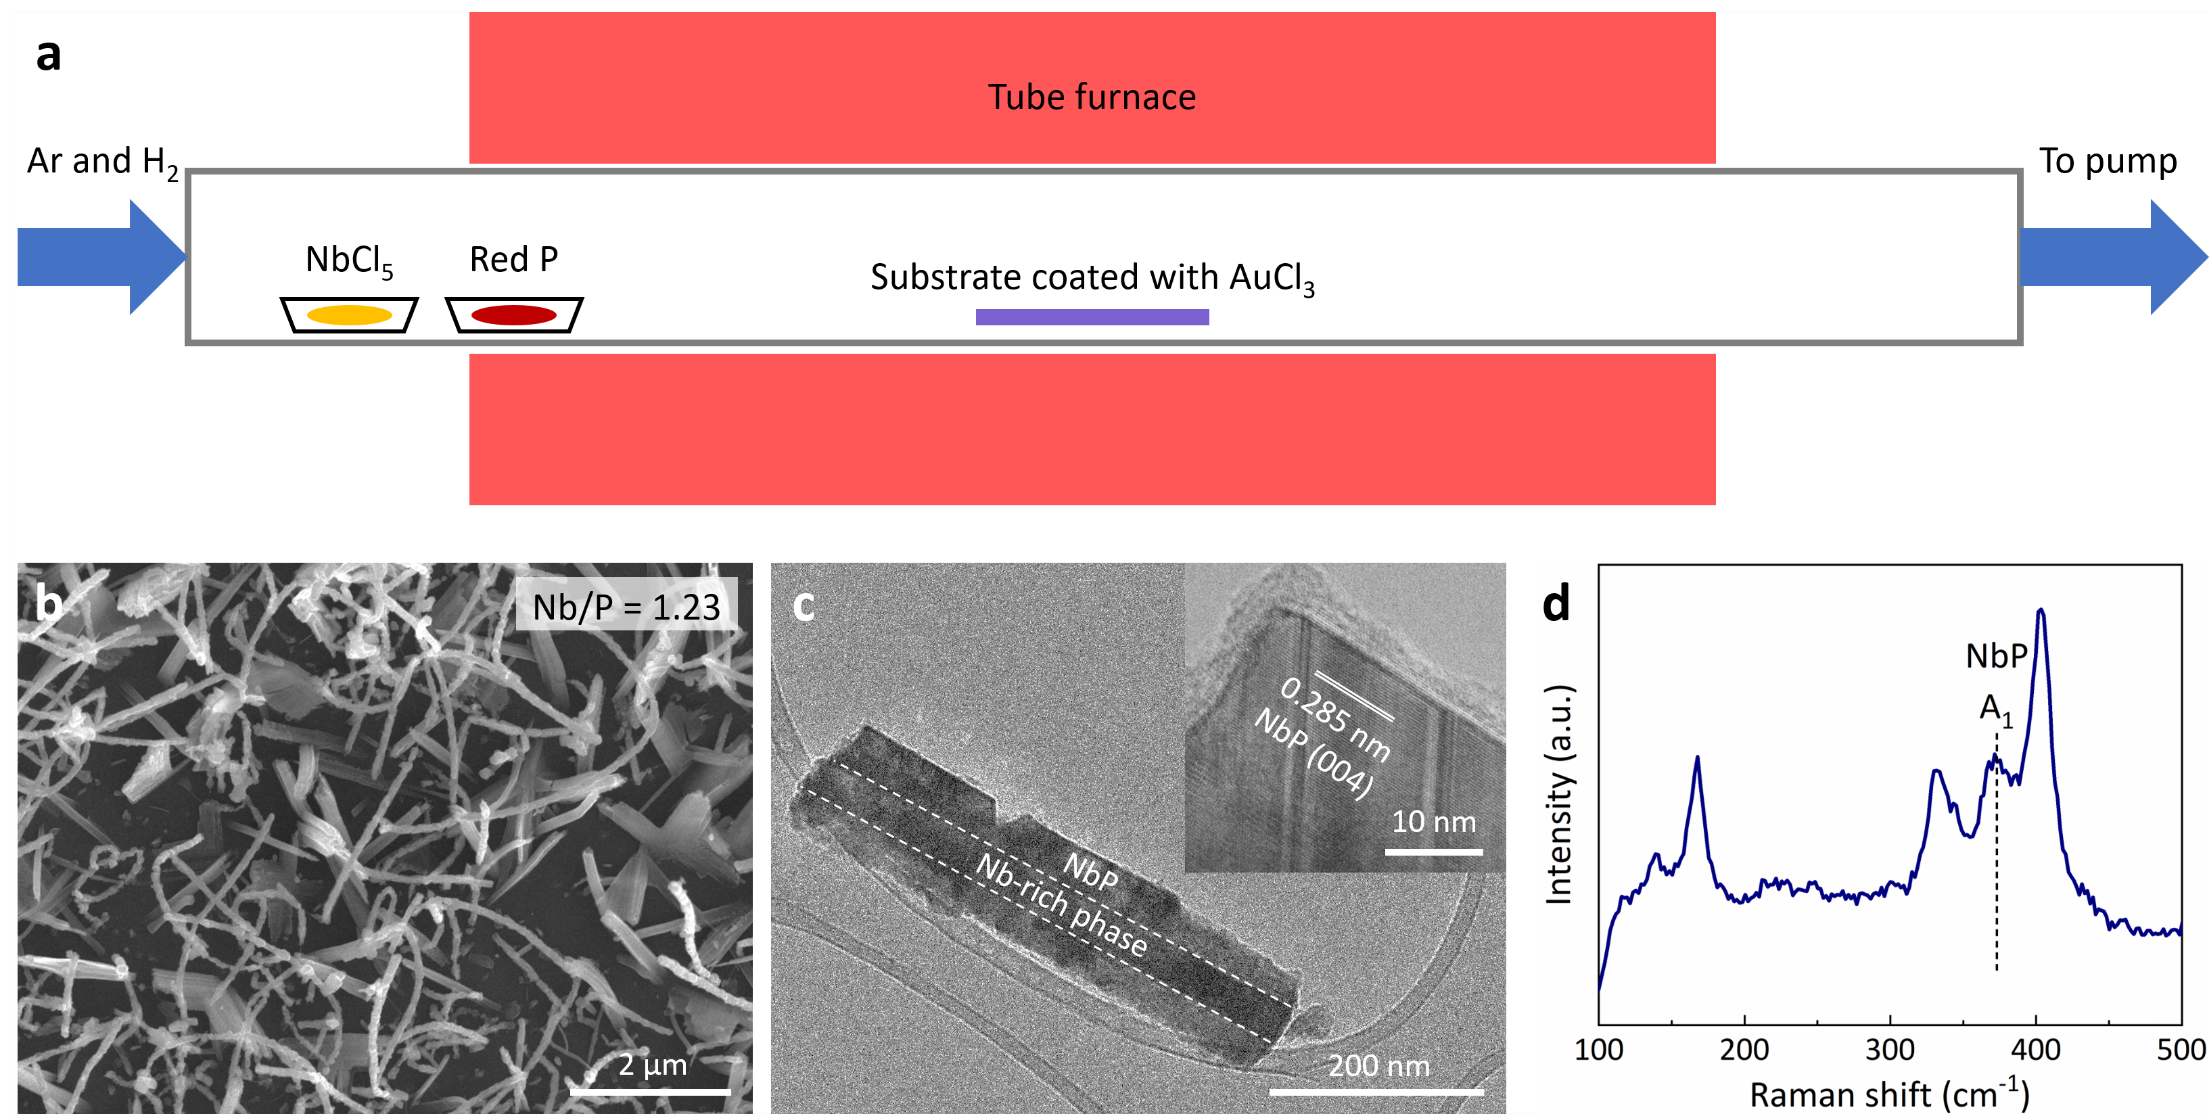


**Figure S15.** Vapor-solid (VS) growth of NbP nanowires with NbCl5 as the Nb source. (a) Schematic of the setup for growing NbP nanowires with NbCl5 as the Nb source. (b) SEM image of the products deposited on the substrate. The atomic ratio between Nb and P was measured using EDS. A non-stoichiometric Nb/P ratio of 1.23 indicates the formation of Nb-rich phases, which should be attributed to the high vapor pressure and poor controllability of NbCl5. In addition, Au seeds were not found at either end of the nanowires, verifying the random nucleation and growth of crystals governed by a VS process, instead of the selective nucleation on the seed surface (VLS or VLLS processes). Therefore, without the regulation from seeds, the diameters of these nanowires were widely distributed from 102–103 nm, exhibiting a much poorer controllability than the case of VLLS. (c) TEM image of a nanowire exhibiting a heterogeneous core-shell structure, with a Nb-rich phase as the core and NbP as the shell. Inset: high-resolution TEM image of the NbP shell with (004) lattice fringes. (d) Raman spectrum of the product, which consists of the *A*1 mode of NbP as well as other strong peaks corresponding to Nb-rich phases. In summary, the SEM, TEM and Raman characterizations clearly demonstrate the huge difficulty in obtaining pure-phase and single-crystalline NbP nanowires with small sizes by VS growth.


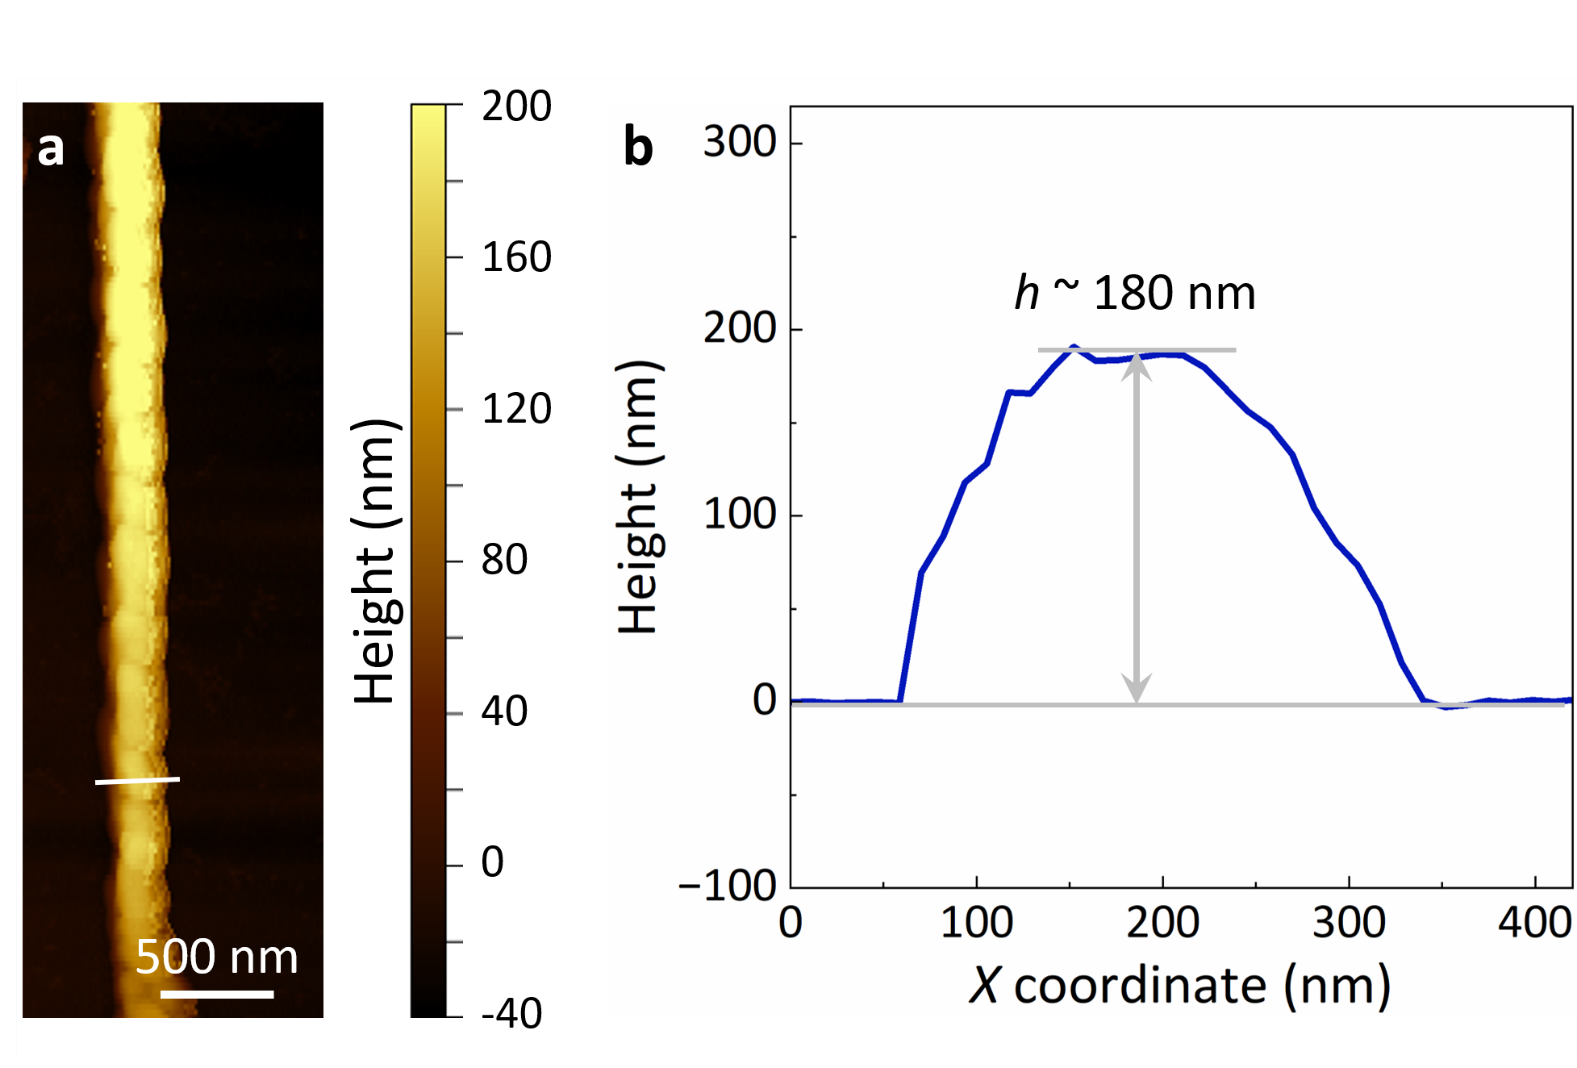


**Figure S16.** AFM characterization of a NbP nanowire. (a) AFM image of a NbP nanowire. (b) Height profile along the white line in (a), showing a thickness of ~ 180 nm.


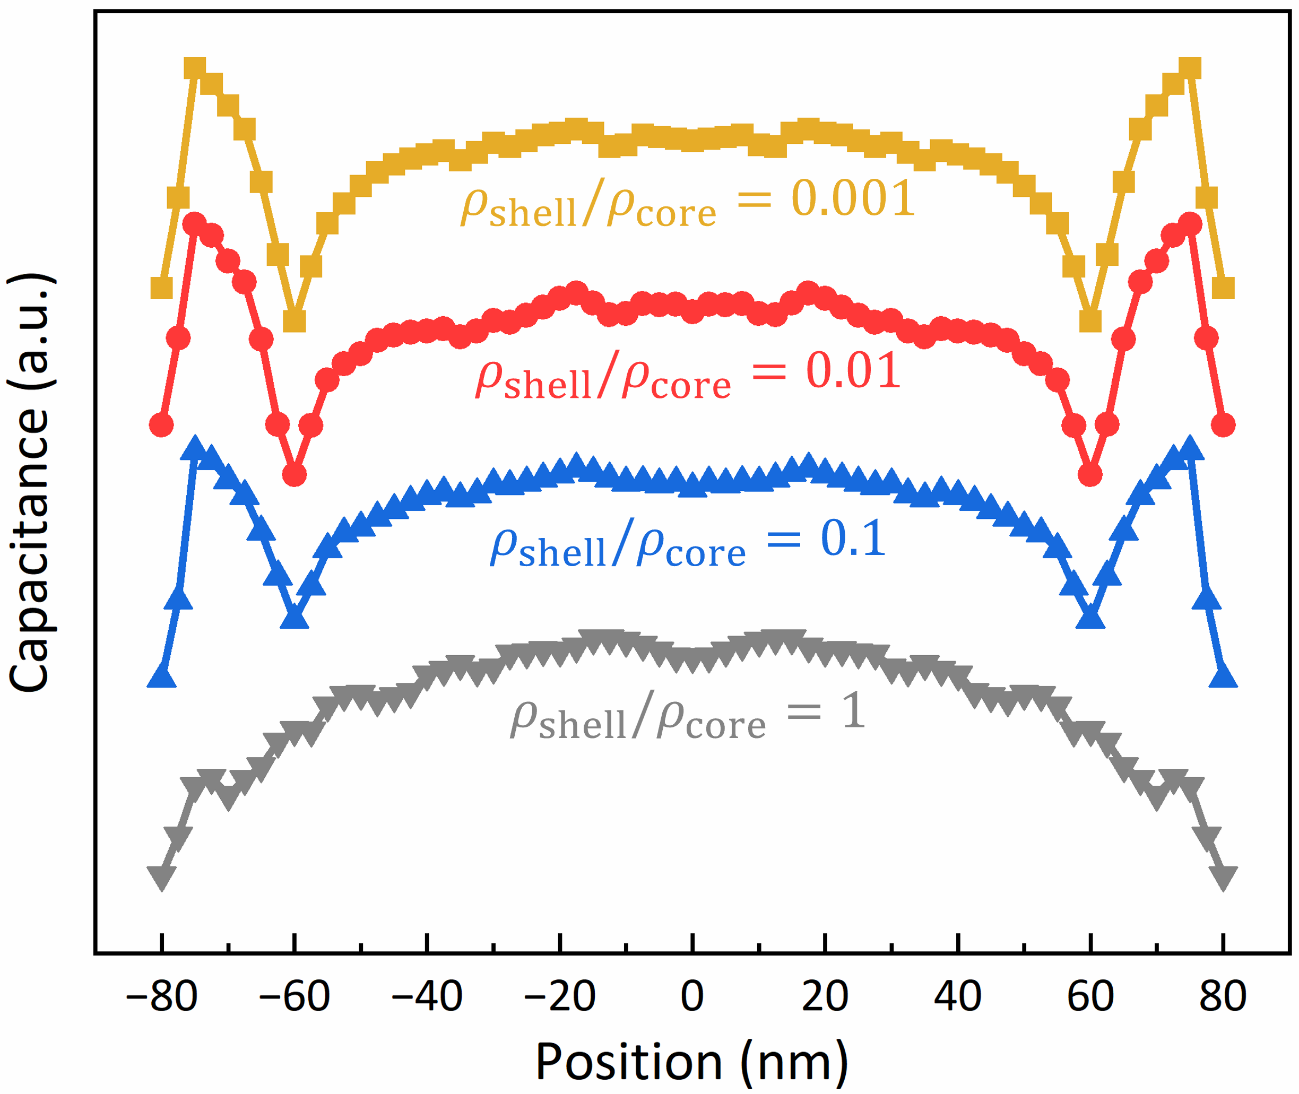


**Figure S17.** Simulated capacitances of surface-conductive and uniform nanowires as functions of position (*ρ*shell / *ρ*core = 0.001, 0.01, 0.1, and 1).

References

1. Xu, J.; Greenblatt, M.; Emge, T.; Höhn, P.; Hughbanks, T.; Tian, Y., Crystal Structure, Electrical Transport, and Magnetic Properties of Niobium Monophosphide. *Inorg. Chem.* **1996,** *35* (4), 845-849.

2. Perdew, J. P.; Burke, K.; Ernzerhof, M., Generalized Gradient Approximation Made Simple. *Phys. Rev. Lett.* **1996,** *77* (18), 3865-3868.

3. Perdew, J. P.; Ruzsinszky, A.; Csonka, G. I.; Vydrov, O. A.; Scuseria, G. E.; Constantin, L. A.; Zhou, X.; Burke, K., Restoring the Density-Gradient Expansion for Exchange in Solids and Surfaces. *Phys. Rev. Lett.* **2008,** *100* (13), 136406.

4. Cheng, Z.; He, S.; Han, X.; Wang, M.; Zhang, S.; Liu, S.; Liang, G.; Zhang, S.; Xia, M., Interfaces determine the nucleation and growth of large NbS2 single crystals. *CrystEngComm* **2021,** *23* (5), 1312-1320.

5. Shafer, M. W.; Roy, R., Phase Equilibria in the System Na2O – Nb2O5. *J. Am. Ceram. Soc.* **1959,** *42* (10), 482-486.

6. Kumar, R.; Miyaoka, H.; Shinzato, K.; Ichikawa, T., Analysis of sodium generation by sodium oxide decomposition on corrosion resistance materials: a new approach towards sodium redox water-splitting cycle. *RSC Adv.* **2021,** *11* (34), 21017-21022.
