# Supplementary material
Source: Research Square preprint supplement (doi:10.21203/rs.3.rs-10083654/v1)

**Table of contents**


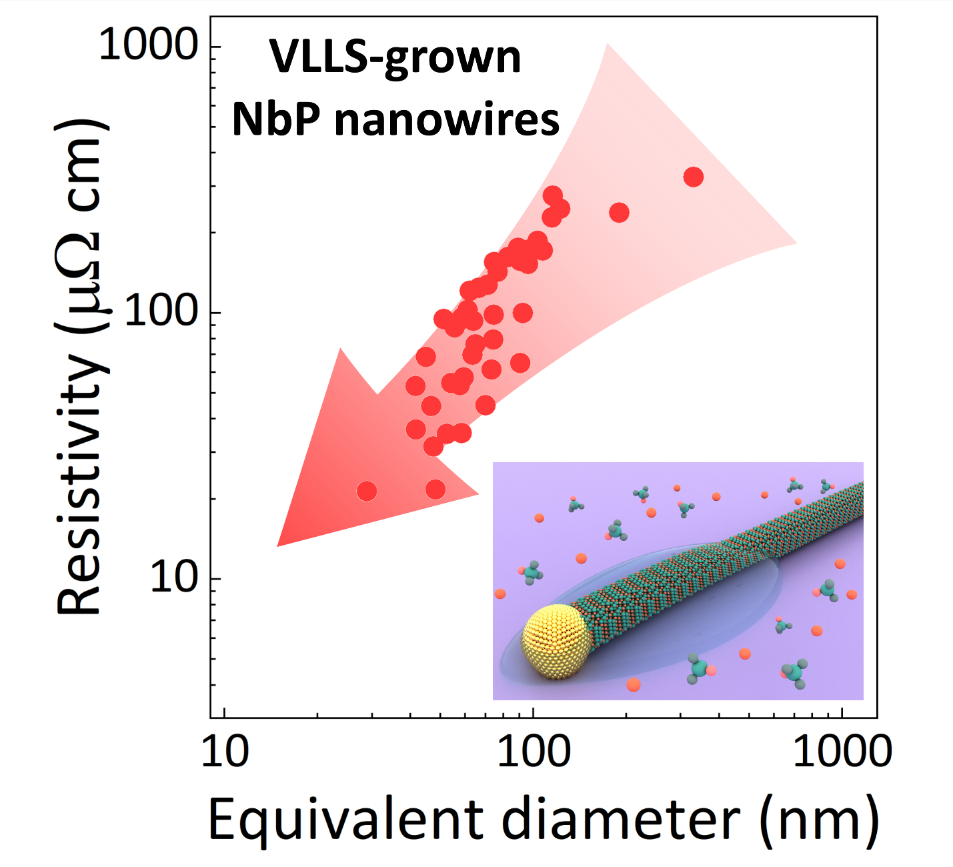

Supplement: Supplementary file 1 [file 1ded0a4d0b046178282f2167.docx]
